1 **Relevance of Mediterranean diet as a nutritional strategy in diminishing**

2 **COVID-19 risk: A systematic review**

3 Ceria Halim<sup>1</sup>, Miranda Howen<sup>1</sup>, Athirah Amirah Nabilah binti Fitrisubroto<sup>1</sup>, Timotius

4 Pratama<sup>1</sup>, Indah Ramadhani Harahap<sup>1</sup>, Lacman Jaya Ganesh<sup>1</sup>, Andre Marolop

5 Pangihutan Siahaan<sup>2\*</sup>

6

7 <sup>1</sup>Department of Center of Evidence Based Medicine, Faculty of Medicine, Universitas

8 Sumatera Utara, Medan, North Sumatera, Indonesia

9 <sup>2</sup>Department of Neurosurgery, Faculty of Medicine, Universitas Sumatera Utara,

10 Medan, North Sumatera, Indonesia

11

12 \*Corresponding author

13 Email: andremarolop@usu.ac.id

## 14 **Abstract**

15 **Background:** Mediterranean Diet has been reported to possess immunomodulatory  
16 and anti-inflammatory properties. These properties are closely associated with the  
17 immunopathogenesis of COVID-19.

18 **Objective:** The present systematic review aimed to determine the association  
19 between Mediterranean Diet and COVID-19, COVID-19 symptoms, and COVID-19  
20 severity.

21 **Methods:** The protocol for this systematic review was registered in International  
22 Prospective Register of Systematic Reviews (PROSPERO) with identification  
23 number CRD42023451794. The literature search was conducted through Pubmed,  
24 Proquest, and Google Scholar on August 2023. The inclusion criteria were studies  
25 with a population of human subjects, reported the association between  
26 Mediterranean diet adherence with risk of COVID-19 infection, COVID-19 symptoms,  
27 or COVID-19 severity, and full text must be available in English. The exclusion  
28 criteria were reviews, editorials, letters, replies, systematic reviews, meta-analyses,  
29 studies on animals, and duplicates. Risk of bias in included studies was assessed  
30 using Newcastle Ottawa Scale (NOS). Data was synthesized narratively. Each study  
31 was compared and a structured summary was developed.

32 **Results:** After selection process, 6 articles were included, with a sample size of  
33 55,489 patients. All studies were observational studies and assessed Mediterranean  
34 diet adherence using food frequency questionnaires (FFQ), with scoring system  
35 varied between each study. Four studies found a significant correlation between  
36 increased adherence to Mediterranean Diet and reduced COVID-19 risk, while one  
37 study indicated non-significant association. One study reported a significant  
38 association between higher adherence to Mediterranean Diet and COVID-19

39 symptoms, but three studies reported non-significant association. One study found  
40 that individuals with higher adherence to Mediterranean Diet had reduced likelihood  
41 of developing severe COVID-19, however, two studies yielded inconclusive findings.

42 **Limitations:** All studies used self-administrated food frequency questionnaires  
43 (FFQs), which were prone to biased responses, such as recall and estimation bias.

44 **Discussion:** Lower trends of odds ratios (ORs) were consistently observed in higher  
45 Mediterranean diet adherence. In every outcome of the included studies, ORs  
46 ranged between 0.06-0.992, however, differing levels of significance were reported in  
47 each outcome.

48 **Conclusion:** Overall analyses suggest that high adherence to Mediterranean Diet is  
49 a protective factor against COVID-19, with unclear benefits against COVID-19  
50 symptoms and severity.

51 **Primary Funding Source:** The author(s) received no specific funding for this work.

## 52 **Introduction**

53 The coronavirus disease 2019 (COVID-19) was declared as a pandemic in  
54 March 2020 and had a widespread impact on individuals across the globe [1].  
55 Studies have reported that fever, cough, and shortness of breath. Other non-specific  
56 symptoms were also reported, such as sore throat, nasal congestion, and shortness  
57 of breath are among the most common symptoms observed in COVID-19 patients. In  
58 addition to the typical respiratory symptoms, COVID-19 has also been associated  
59 with a range of atypical manifestation, such as headache, diarrhea, nausea, and  
60 vomiting [2]. The World Health Organization (WHO) has classified COVID-19  
61 disease severity into four groups: oxygen saturation, and inflammatory biomarker

62 into mild, moderate, severe, or critical. This classification was based on a  
63 combination of symptoms, oxygen saturation, and inflammatory biomarkers [2].

64 Inflammation has been widely recognized as a critical factor in the  
65 development and the degree of severity in COVID-19. After the initial innate immune  
66 response, a potent uncontrolled inflammatory response called cytokine storm may  
67 follow. Cytokine storm, characterized by excessive inflammation caused by high  
68 levels of cytokines, particularly IL-6, IL-1, and TNF- $\alpha$ , can lead to advanced disease,  
69 multiorgan involvement, and serious consequences [3]. Cytokine storm has been  
70 identified as a potential target for therapeutic interventions, and multiple approaches.  
71 Immunomodulatory drugs, including dexamethasone and tocilizumab, as well as  
72 exosomes generated from mesenchymal stem cells and plasmapheresis, have been  
73 employed as ways to regulate this hyperinflammatory response [4]. These studies  
74 were just a few out of others that cemented the important role of inflammation in  
75 COVID-19.

76 The Mediterranean diet is a dietary pattern that consists primarily of plant-  
77 derived nutritional components, such as fruits, vegetables, legumes, nuts, and olive  
78 oil, and has been linked to anti-inflammatory properties and a reduced likelihood of  
79 developing cardiovascular disease [5]. Adherence to Mediterranean diet has been  
80 reported to lower the expression of pro-inflammatory molecules, such as IL-6 and  
81 CRP, as well as a reduction in the overall systemic inflammatory status, and various  
82 disorders associated with persistent low-grade inflammation [6]. Researchers had  
83 suggested the potential association between diet and viral infections [7]. This has led  
84 to the growing proposition of the protective effects of Mediterranean diet towards  
85 COVID-19 [8,9].

86           Based on the properties of Mediterranean diet that have been described  
87 above, this systematic review aims to address the association between  
88 Mediterranean diet and COVID-19 risk, COVID-19 symptoms, and COVID-19  
89 severity.

## 90 **Materials and methods**

### 91 **Protocol writing and registration**

92           The protocol for this systematic review was registered on 15<sup>th</sup> September  
93 2023 with the International Prospective Register of Systematic Reviews  
94 (PROSPERO) with identification number CRD42023451794. This systematic review  
95 was reported based on the Preferred Reporting Items for Systematic Reviews and  
96 Meta-Analyses (PRISMA) statement [10].

### 97 **Search strategy**

98           Literature search was conducted on 3 search engines, Pubmed, Proquest and  
99 Google Scholar, on 16th August 2023. Literature search was done using the keyword  
100 "Mediterranean diet and COVID-19", with detailed search strategy and medical  
101 subject headings (MeSH) described below (S1 File). No additional article or abstract  
102 was selected from other sources.

### 103 **Study selection**

104           The inclusion criteria for this systematic review were studies with a population  
105 of human subjects, and reported the association between Mediterranean diet  
106 adherence with COVID-19 infection, COVID-19 symptoms, or severe COVID-19. No  
107 study design nor publication date restriction were applied. Full-text must be available

108 in English. The exclusion criteria were reviews, editorials, letters, replies, systematic  
109 reviews, meta-analyses, studies on animals, and duplicates.

110 Deduplication was carried out using the Rayyan application [11]. The  
111 remaining articles were screened based on title and abstract manually by two  
112 reviewers working individually. No automation tool was used in the process. Each  
113 article would be sought for further review if at least one reviewer considered it to  
114 fulfill the criteria and was within the scope of this systematic review. Studies that  
115 passed the initial screening would be sought for retrieval. Two reviewers working  
116 together further reviewed the full-text of each literature for its eligibility.

## 117 **Data extraction**

118 Data were collected by two reviewers working separately using data collection  
119 standards set previously. This included name of the first author, year of publication,  
120 study location, study design, total and characteristics of participants. Mediterranean  
121 diet association with COVID-19 infection, symptoms, and severity, Mediterranean  
122 diet adherence and outcome definition were also recorded. All results that were  
123 compatible with each outcome domain in each study were sought. Missing data were  
124 not sought further.

## 125 **Quality assessment**

126 Risk of bias assessment was carried out by two reviewers working  
127 independently. Non-randomized studies were assessed using Newcastle-Ottawa  
128 Scale (NOS) [12]. NOS criteria in cross-sectional studies were adapted from cohort  
129 criteria [13]. Randomized studies were assessed using revised Cochrane risk of bias  
130 tool for randomized trials (RoB2) [14]. Disagreement between reviewers' judgement  
131 was resolved by soliciting a third reviewer's opinion.

## 132 **Data synthesis**

133 Data was synthesized narratively. The minimum number of studies was two  
134 for each analysis. The outcome was measured with odds ratio (OR) for COVID-19  
135 infection, symptoms, and severity. Study characteristics, risk of bias, and study  
136 findings, and other relevant data were reported and tabulated. Similarities,  
137 differences, strengths, and limitations were compared across studies. A structured  
138 summary was also presented, to further elaborate the extracted data [15]. No  
139 subgroup nor sensitivity analyses were carried out.

## 140 **Reporting bias and certainty assessment**

141 Reporting bias was evaluated using a tool by Page et al. [16] and RoBANS 2:  
142 A Revised Risk of Bias Assessment Tool for Nonrandomized Studies of Interventions  
143 [17]. We used the Grading of Recommendations, Assessment, Development, and  
144 Evaluations (GRADE) approach to define the certainty in the body of evidence [18].

## 145 **Results**

### 146 **Literature Search**

147 A total of 325 records were identified across Pubmed, Proquest and Google  
148 Scholar. Duplicates were removed, with 209 records remained and screened.  
149 Thirteen articles were sought for retrieval and were further reviewed for eligibility. Six  
150 articles were deemed eligible and were included in this systematic review. A flow  
151 chart of selection process and exclusion reasons is provided below (Fig 1).

### 152 **Fig 1. Article selection process flow diagram.**

153 The study by Mohajeri et al. [19] appear to meet the inclusion criteria, but  
154 were excluded, as the outcome of COVID-19, COVID-19 symptoms, or COVID-19

155 severity were not reported. The study only reported outcome of inflammatory  
156 biomarkers.

## 157 **Study characteristics**

158 All 6 articles were observational studies, published in 2020-2023 [20-25]. The  
159 total sample was 55,489 patients, with study location across 5 countries. The  
160 majority of the studies had a prospective cohort design. Five studies reported the  
161 association between Mediterranean diet adherence and COVID-19 infection, four  
162 reported the association between Mediterranean diet adherence and COVID-19  
163 symptoms, and three reported the association between Mediterranean diet  
164 adherence and severe COVID-19.

165 All studies measured the Mediterranean diet adherence using questionnaires,  
166 with scoring system varying between study to study. All Mediterranean diet  
167 adherence included categories such as, vegetables, fruits and nuts, cereals,  
168 legumes, fish, red meat, dairy, and alcohol consumption. Monounsaturated to  
169 saturated fat ratio was also an essential component in Mediterranean diet score,  
170 although four studies replaced monounsaturated fat to saturated fat ratio with olive  
171 oil intake [20-23]. The reason behind this was that the ratio of monounsaturated to  
172 saturated fats does not correspond to a specific food and the fact that olive oil is also  
173 the main source of monounsaturated fats in the traditional Mediterranean diet [21].  
174 Newcastle Ottawa Scale (NOS), used to assess risk of bias was presented along the  
175 study characteristics in Table 1.



**Table 1. Study Characteristics**

| Author                              | Study Design                  | Study Location | Participants                                                                                     | Exposure                                                                                                                                                                                  | Food Groups                                                                                                                                                                                        | Outcome Analysed                                   | NOS |
|-------------------------------------|-------------------------------|----------------|--------------------------------------------------------------------------------------------------|-------------------------------------------------------------------------------------------------------------------------------------------------------------------------------------------|----------------------------------------------------------------------------------------------------------------------------------------------------------------------------------------------------|----------------------------------------------------|-----|
| <b>El Khoury, 2021 [20]</b>         | Observational case control    | Lebanon        | 399 Lebanese citizens residing in Lebanon, males or non-pregnant females, aged 21-64 years old   | The MedDiet score, measured using FFQ, ranging from 0 (minimal adherence) to 55 (maximal adherence).                                                                                      | Score was calculated from 11 food groups: non-refined cereals, potatoes, fruits, vegetables, legumes, fish, red meat and products, poultry, full-fat dairy, olive oil, and alcohol                 | COVID-19<br>COVID-19 symptoms                      | 8   |
| <b>Perez-Araluce, R., 2022 [21]</b> | Prospective cohort            | Spain          | 9,485 participants                                                                               | The Mediterranean Diet Score (MDS), measured using semiquantitative FFQ, ranging from 0 (minimal adherence) to 9 (maximal adherence).                                                     | Score was calculated from 9 categories: ethanol, olive oil, cereals, fruits and nuts, vegetables, legumes, fish, meat, whole dairy products.                                                       | COVID-19<br>COVID-19 symptoms<br>COVID-19 severity | 8   |
| <b>Ponzo, V., 2021 [22]</b>         | Observational retrospective   | Italy          | 900 health professionals still active at work and in contact with patients, aged 20-65 years old | The validated Medi-lite adherence score, measured using FFQ, ranging from 0 (minimal adherence) to 18 (maximal adherence).                                                                | Score was assessed from 9 food categories: fruit, vegetables, cereals, meat and meat products, dairy products, alcohol, and olive oil, legumes, and fish.                                          | COVID-19                                           | 4   |
| <b>Sharma, S., 2023 [23]</b>        | Prospective cohort            | Italy          | 1,520 participants                                                                               | The Mediterranean Diet Score (MDS), measured using semiquantitative FFQ. MDS ranging from 0 (minimal adherence) to 9 (maximal adherence).                                                 | Score was assessed from the 9 components: fruits and nuts, vegetables, legumes, fish, cereals, olive oil, meat, dairy products, ethanol consumption.                                               | COVID-19                                           | 7   |
| <b>Yue, Y., 2022 [24]</b>           | Prospective cohort            | United States  | 42,935 healthcare professionals aged 55-99 years old                                             | The alternate Mediterranean Diet Score (aMED), measured using validated, self-administered, semiquantitative FFQ. AMED score ranging from 0 (minimal adherence) to 9 (maximal adherence). | Score was calculated from 9 components: vegetables, fruits, nuts, whole grains, legumes, fish, and the ratio of monounsaturated to saturated fat, red and processed meat consumption, and alcohol. | COVID-19<br>COVID-19 symptoms<br>COVID-19 severity | 7   |
| <b>Zargarzadeh, N., 2022 [25]</b>   | Retrospective cross-sectional | Iran           | 250 patients aged 18–65 who had recovered from COVID-19                                          | The Mediterranean Diet Score (MDS), measured using FFQ. MDS ranging from 0 (minimal adherence) to 9 (maximal adherence).                                                                  | Score was calculated from 9 categories: vegetables, legumes, fruits and nuts, cereal, and fish, meat, poultry and dairy, ethanol, and monounsaturated to saturated fat ratio                       | COVID-19<br>symptoms<br>COVID-19 severity          | 8   |

NOS = Newcastle Ottawa Scale; FFQ = Food Frequency Questionnaire; COVID-19 = Coronavirus Disease 2019.

## 179 **Mediterranean diet and COVID-19**

180 A total of five studies investigated the association between Mediterranean diet  
181 adherence and COVID-19 [20-24] with a sample size of 55,239 patients as listed in  
182 Table 2. Three studies analyzed Mediterranean diet adherence as continuous  
183 variable of 1-point increment, one study analyzed Mediterranean diet adherence as  
184 categorical variable in a cut-off determined by the respective study, and one study  
185 analyzed Mediterranean diet adherence as both categorical variable in quartiles and  
186 continuous variable of 1-SD increment. Four studies relied on self-report of previous  
187 history of COVID-19 to determine COVID-19 cases, while one study relied on both  
188 serologic testing and self-report.

189 Three out of five studies reported Mediterranean diet adherence significantly  
190 lower risk of COVID-19, while two studies stated non-significant results. All five  
191 studies reported OR ranging between 0.75–0.948. The study by El Khoury et al., [20]  
192 reported the OR of being non infected by COVID-19 (OR= 1.055, 95%CI: 1.013–  
193 1.099,  $p= 0.01$ ). This data was then inverted to properly reflect the odds of COVID-  
194 19 as noted in Table 2. Three studies adjusted for potential confounding variables.  
195 Three studies analyzed the association of Mediterranean diet individual components  
196 with COVID-19 risk. Among the food categories, higher olive oil consumption, lower  
197 red meat consumption, lower cereal consumption, moderate amounts of alcohol, and  
198 higher intake of fruit and nuts were reported to lower risk against COVID-19.

**Table 2. Mediterranean Diet and COVID-19.**

| Author                              | Mediterranean Diet adherence                                          | Comparison                                                                                                                                            | COVID-19 definition                                                                                                                                                                                                 | Results                                                                                                                                                                                                                                                                                                  | Adjusted for                                                                                                                                                                                                                                                                                                                                                                                                                                                | Mediterranean diet components analyzed                                                                                                               |
|-------------------------------------|-----------------------------------------------------------------------|-------------------------------------------------------------------------------------------------------------------------------------------------------|---------------------------------------------------------------------------------------------------------------------------------------------------------------------------------------------------------------------|----------------------------------------------------------------------------------------------------------------------------------------------------------------------------------------------------------------------------------------------------------------------------------------------------------|-------------------------------------------------------------------------------------------------------------------------------------------------------------------------------------------------------------------------------------------------------------------------------------------------------------------------------------------------------------------------------------------------------------------------------------------------------------|------------------------------------------------------------------------------------------------------------------------------------------------------|
| <b>EI Khoury, C. N., 2021 [20]</b>  | Mediterranean diet score, ranging from 0 to 55.                       | Each 1-point increment.                                                                                                                               | COVID-19 infection history is self reported.                                                                                                                                                                        | Multiple binary logistic regression tests showed a significantly lower odds of COVID-19 (OR= 0.948, 95% CI: 0.910–0.987, p = 0.01).                                                                                                                                                                      | Not stated.                                                                                                                                                                                                                                                                                                                                                                                                                                                 | None.                                                                                                                                                |
| <b>Perez-Araluce, R., 2022 [21]</b> | Mediterranean Diet Score (MDS), ranging from 0 to 9.                  | High adherence group (7 ≤ MDS ≤ 9) and intermediate adherence group (4 ≤ MDS ≤ 6) were compared with low adherence group (MDS <4).                    | COVID-19 is self reported. Two definitions are used. One, more specific, participants who reported a positive diagnostic test. Two, a broader definition, participants with a medical diagnosis were also included. | High adherence group had insignificant lower odds for positive diagnostic COVID-19 test (OR= 0.75, 95% CI: 0.49–1.13, p for trend = 0.166) and both positive diagnostic test and medical diagnosis of COVID-19 (OR= 0.79, 95% CI: 0.58–1.08, p for trend = 0.137), when compared to low adherence group. | Age, sex, years of university studies, marital status, smoking, BMI, physical activity at leisure-time, year of entering the cohort, previous diagnosis of chronic diseases, and category of consumption of the other food groups.                                                                                                                                                                                                                          | Yes. Higher olive oil and lower red meat consumption showed lower odds of COVID-19 risk.                                                             |
| <b>Ponzo, V., et al., 2021 [22]</b> | Medi-lite adherence score, ranging from 0 to 18.                      | Each 1-point increment.                                                                                                                               | SARS-COV-2 infection is self reported.                                                                                                                                                                              | In a logistic regression model, each 1-point increment in the MeD score was associated with a lower risk of SARS-COV-2 infection (OR= 0.88, 95% CI: 0.81–0.97, p= 0.01).                                                                                                                                 | Not stated.                                                                                                                                                                                                                                                                                                                                                                                                                                                 | Yes. Higher cereal consumption lower SARS-COV-2 infection.                                                                                           |
| <b>Sharma, S., 2023 [23]</b>        | Mediterranean diet score, ranging from 0 to 9.                        | Each 1-point increment.                                                                                                                               | SARS-CoV-2 infection cases were determined through serology, and previous clinical diagnosis of COVID-19 disease was self-reported.                                                                                 | In multivariable-adjusted logistic regression models, increased adherence to a traditional MD was not associated with risk of SARS-CoV-2 infection (OR=0.94, 95% CI: 0.83–1.06; p-value for trend= 0.30)                                                                                                 | Age, sex, energy intake, educational level, occupational class, marital status, being health professional, smoking status, body mass index, leisure-time physical activity, baseline history of CVD, cancer, diabetes, hypertension, dyslipidemia, number of chronic diseases diagnosed since March 2020, and the composite index of behavioral and environmental risk factors SARS-CoV-2 infection.                                                        | Yes. Higher consumption of olive oil, moderate amounts of alcohol, and higher intake of fruits and nuts were associated with lower odds of COVID-19. |
| <b>Yue, Y., et al., 2022 [24]</b>   | The alternative Mediterranean diet (AMED) score, ranging from 0 to 9. | The multivariable-adjusted ORs comparing the top with the bottom quartile of AMED score. Continuous analyses for a 1-SD increment were also reported. | Self-reported SARS-CoV-2 infection, including positive results from an antigen or antibody test.                                                                                                                    | Using multivariable logistic regression models, the top quartile AMED had lower risk of SARS CoV-2 infection than the bottom quartile (OR= 0.78, 95% CI: 0.67–0.92; P-trend= 0.0032) Continuous analyses for 1-SD increment showed similar results (OR= 0.90, 95% CI: 0.85–0.95, p-trend= 0.0032)        | Age, sex, race, smoking, physical activity, total energy intake, census tract median family income, census tract median family home value, census tract population density, concern about COVID-19, interaction with people other than patients with presumed or documented COVID-19, frontline health care providers and PPE use, BMI, history of high cholesterol, history of high blood pressure, and presence of other pre-existing medical conditions. | None.                                                                                                                                                |

OR = odds ratio; CI = confidence interval; SD = standard deviation; COVID-19 = Coronavirus Disease 2019; SARS-CoV-2 = Severe Acute Respiratory Syndrome Coronavirus 2; BMI = body mass index; PPE = personal protective equipment.

## 199 **Mediterranean diet and COVID-19 symptoms**

200 Four studies reported the association between Mediterranean diet adherence  
201 and COVID-19 symptoms [20,21,24,25] with a sample size of 53,069 patients.  
202 Differing comparison of Mediterranean diet adherence score was reported across  
203 studies with one each of, continuous variable of 1-point increment, categorical  
204 variable in a cut-off determined by the authors of the study, categorical variable in  
205 tertiles, and as both categorical variable in quartiles and continuous variable of 1-SD  
206 increment, as detailed in Table 3. All studies depended on self-report for the  
207 presence of COVID-19 symptoms, and analyzed the odds ratio using logistic  
208 regression with yes/no type outcome. Two studies analyzed for symptomatic COVID-  
209 19 outcome [21,24], one study for moderate COVID-19 burden (defined as presence  
210 of 5–10 symptoms) [20], and one study analyzed for each COVID-19 symptom [25].

211 The study by Zagarzadeh et al. [25] found that higher Mediterranean diet  
212 adherence significantly decrease the odds for all reported COVID-19 symptoms, with  
213 OR varied between 0.06–0.34 for each symptom. Three studies reported  
214 insignificant association, with OR of each study ranging between 0.84–0.992, and p  
215 value >0.05, although the result from Yue et al. [24] did reach the limit of statistical  
216 significance (OR= 0.89, 95% CI: 0.80–0.99; P-trend= 0.0549). Multiple potential  
217 confounding variables were adjusted in the analyses of all studies. One study  
218 analyzed the relation of individual components of Mediterranean diet with COVID-19  
219 symptoms, yet no food categories were found to be significant.

**Table 3. Mediterranean Diet and COVID-19 symptoms.**

| Author                              | Mediterranean Diet adherence                                          | Comparison                                                                                                                                            | COVID-19 symptoms definition                                                                                                                                                                              | Results                                                                                                                                                                                                                                                                                                                                                                                                                                                                                                                                                                                                  | Adjusted for                                                                                                                                                                                                                                                                                                                                                                                                                                                | Mediterranean diet components analysed           |
|-------------------------------------|-----------------------------------------------------------------------|-------------------------------------------------------------------------------------------------------------------------------------------------------|-----------------------------------------------------------------------------------------------------------------------------------------------------------------------------------------------------------|----------------------------------------------------------------------------------------------------------------------------------------------------------------------------------------------------------------------------------------------------------------------------------------------------------------------------------------------------------------------------------------------------------------------------------------------------------------------------------------------------------------------------------------------------------------------------------------------------------|-------------------------------------------------------------------------------------------------------------------------------------------------------------------------------------------------------------------------------------------------------------------------------------------------------------------------------------------------------------------------------------------------------------------------------------------------------------|--------------------------------------------------|
| <b>El Khoury, C. N., 2021 [20]</b>  | Mediterranean diet score, ranging from 0 to 55.                       | Each 1-point increment.                                                                                                                               | Self-reported COVID-19 symptoms. The COVID-19 burden was determined based on the number of symptoms and hospitalization as follows; <5 symptoms: mild burden, between 5 and 10 symptoms: moderate burden. | Using multiple adjusted logistic regression, MedDiet score did not reduce the risk of moderate COVID-19 burden, (OR= 0.992; 95% CI: 0.873–1.129, p= 0.908).                                                                                                                                                                                                                                                                                                                                                                                                                                              | Age, pre-existing health conditions and respiratory diseases                                                                                                                                                                                                                                                                                                                                                                                                | None.                                            |
| <b>Perez-Araluce, R., 2022 [21]</b> | Mediterranean Diet Score, ranging from 0 to 9.                        | High adherence group (7 ≤ MDS ≤ 9) and intermediate adherence group (4 ≤ MDS ≤ 6) were compared with low adherence group (MDS <4).                    | Self-reported cases of symptomatic COVID-19, with symptoms included in this definition were: cough, cold, respiratory distress, loss of smell or taste, diarrhea, and fever                               | Using multivariable adjusted logistic regression models, high adherence group had insignificant lower odds for symptomatic COVID-19 (OR= 0.84; 95% CI: 0.60–1.16, P= 0.294)                                                                                                                                                                                                                                                                                                                                                                                                                              | Age, sex, years of university studies, marital status, smoking, BMI, physical activity at leisure-time, year of entering the cohort, previous diagnosis of chronic diseases, and category of consumption of the other food groups.                                                                                                                                                                                                                          | Yes. No components were found to be significant. |
| <b>Yue, Y., et al., 2022 [24]</b>   | The alternative Mediterranean diet (AMED) score, ranging from 0 to 9. | The multivariable-adjusted ORs comparing the top with the bottom quartile of AMED score. Continuous analyses for a 1-SD increment were also reported. | Self-reported COVID-19 symptoms including fever, sore throat, muscle aches, loss of taste, loss of smell, and other symptoms consistent with COVID-19 infection.                                          | Using multivariable logistic regression models, the association between AMED score and symptomatic SARS-CoV 2 infection reached borderline significance with lower risk of symptomatic SARS-CoV 2 infection trends (OR= 0.89, 95% CI: 0.80–0.99; P-trend= 0.0549) Continuous analyses for 1-SD increment showed similar results (OR= 0.96, 95% CI: 0.93–1.00, p-trend= 0.0549)                                                                                                                                                                                                                           | Age, sex, race, smoking, physical activity, total energy intake, census tract median family income, census tract median family home value, census tract population density, concern about COVID-19, interaction with people other than patients with presumed or documented COVID-19, frontline health care providers and PPE use, BMI, history of high cholesterol, history of high blood pressure, and presence of other pre-existing medical conditions. | None.                                            |
| <b>Zargarzadeh, N., 2022 [25]</b>   | Mediterranean diet score, ranging from 0 to 9.                        | Participants were divided into tertile groups based on their MD score.                                                                                | Self-reported presence of common COVID-19 manifestations, i.e., fever, chilling, dyspnea, cough, weakness, muscle pain, sore throat, nausea, and vomiting.                                                | Using binary logistic regression, there was a significant inverse relationship between the Mediterranean diet score and the likelihood of experiencing COVID-19 symptoms such as dyspnea (OR= 0.32; 95% CI: 0.13–0.76, P= 0.03), cough (OR= 0.11; 95% CI: 0.05–0.26, P <0.001), fever (OR= 0.11; 95% CI: 0.03–0.37, P <0.001), chilling (OR= 0.06; 95% CI: 0.01–0.26, P <0.001), weakness (OR= 0.34; 95% CI: 0.15–0.76, P= 0.01), myalgia (OR= 0.34; 95% CI: 0.16–0.72, P= 0.005), nausea and vomiting (OR= 0.06; 95% CI: 0.01–0.30, P <0.001), and sore throat (OR= 0.08; 95% CI: 0.03–0.21, P <0.001). | Age, sex, energy intake/BMR, physical activity, supplement use, corticosteroids use, antiviral drugs use, BMI.                                                                                                                                                                                                                                                                                                                                              | None.                                            |

OR = odds ratio; CI = confidence interval; SD = standard deviation; COVID-19 = Coronavirus Disease 2019; BMI = body mass index; PPE = personal protective equipment; BMR = basal metabolic rate.

## 220 **Mediterranean diet and COVID-19 severity**

221           The association between Mediterranean diet adherence and COVID-19  
222 severity were analyzed in three observational studies [21,24-25] with a sample size  
223 of 52,670 patients, as listed in Table 4. Various comparison of Mediterranean diet  
224 adherence score was reported, with one study as a categorical variable in a cut-off  
225 determined in the study, one study as a categorical variable in tertiles, and one study  
226 as a continuous variable of 1-SD increment. Self-report of hospitalization due to  
227 COVID-19 was the main method to determine severe COVID-19 cases. One study  
228 examined the medical records of the participants for severe COVID-19, in  
229 accordance with the National Institute of Health’s Coronavirus Disease 2019 (COVID  
230 19) Treatment Guidelines.

231           The study by Zagarzadeh et al. [25] found that participants with top tertile  
232 Mediterranean diet score were less likely to have severe COVID-19 (OR= 0.23; 95%  
233 CI: 0.11–0.50, P <0.001). than the bottom tertile. Two studies reported insignificant  
234 association with OR ranging 0.22–0.89, and p value > 0.05. All studies adjusted for  
235 potential confounding variables. Two studies analyzed the effects of Mediterranean  
236 diet individual components against COVID-19 severity. One study found no individual  
237 components were significant, while the study by Zagarzadeh et al. [25] reported  
238 higher consumption of vegetables, fruits, legumes, nuts, whole grains, and fish lower  
239 odds of severe COVID-19.

**Table 4. Mediterranean Diet and COVID-19 severity.**

| Author                              | Mediterranean Diet adherence                                          | Comparison                                                                                                                                                                       | Severe COVID-19 definition                                                                                                                                                                           | Results                                                                                                                                                                                 | Adjusted for                                                                                                                                                                                                                                                                                                                                                                                                                                                | Mediterranean diet components analysed                                                                                                  |
|-------------------------------------|-----------------------------------------------------------------------|----------------------------------------------------------------------------------------------------------------------------------------------------------------------------------|------------------------------------------------------------------------------------------------------------------------------------------------------------------------------------------------------|-----------------------------------------------------------------------------------------------------------------------------------------------------------------------------------------|-------------------------------------------------------------------------------------------------------------------------------------------------------------------------------------------------------------------------------------------------------------------------------------------------------------------------------------------------------------------------------------------------------------------------------------------------------------|-----------------------------------------------------------------------------------------------------------------------------------------|
| <b>Perez-Araluce, R., 2022 [21]</b> | Mediterranean Diet Score (MDS), ranging from 0 to 9.                  | High adherence group ( $7 \leq \text{MDS} \leq 9$ ) and intermediate adherence group ( $4 \leq \text{MDS} \leq 6$ ) were compared with low adherence group ( $\text{MDS} < 4$ ). | Self-reported cases of COVID-19 that required hospitalization with symptoms compatible with the disease.                                                                                             | Multivariable adjusted, higher adherence was not associated with severe COVID-19 (OR= 0.22; 95% CI: 0.03–1.77, p for trend= 0.153) compared to low adherence group.                     | Age, sex, years of university studies, marital status, smoking, BMI, physical activity at leisure-time, year of entering the cohort, previous diagnosis of chronic diseases, and category of consumption of the other food groups.                                                                                                                                                                                                                          | Yes.<br>No components were found to be significant.                                                                                     |
| <b>Yue, Y., et al., 2022. [24]</b>  | The alternative Mediterranean diet (AMED) score, ranging from 0 to 9. | Continuous analyses ORs for a 1-SD increment in AMED score.                                                                                                                      | Self-reported COVID-19 participants that required hospitalization.                                                                                                                                   | Using multivariable logistic regression models, 1-SD increments of AMED scores was not associated with severe infection (OR= 0.89, 95% CI: 0.73–1.08; P-trend= 0.8288)                  | Age, sex, race, smoking, physical activity, total energy intake, census tract median family income, census tract median family home value, census tract population density, concern about COVID-19, interaction with people other than patients with presumed or documented COVID-19, frontline health care providers and PPE use, BMI, history of high cholesterol, history of high blood pressure, and presence of other pre-existing medical conditions. | None.                                                                                                                                   |
| <b>Zargarzadeh, N., 2022 [25]</b>   | Mediterranean diet score (MDS), ranging from 0 to 9.                  | Participants were divided into tertile groups based on their MDS.                                                                                                                | The researchers examined the medical records of the participants, with severe COVID-19 classified using the National Institute of Health's Coronavirus Disease 2019 (COVID 19) Treatment Guidelines. | In multivariable-adjusted logistic regression models, highest MDS was 77% less likely to have severe COVID-19 than those with the lowest score (OR= 0.23; 95% CI: 0.11–0.50, P <0.001). | Age, sex, energy intake/BMR, physical activity, supplement use, corticosteroids use, antiviral drugs use, BMI.                                                                                                                                                                                                                                                                                                                                              | Yes.<br>Higher consumption of vegetables, fruits, legumes, nuts, whole grains, and fish were reported to lower odds of severe COVID-19. |

OR = odds ratio; CI = confidence interval; SD = standard deviation; COVID-19 = Coronavirus Disease 2019; BMI = body mass index; PPE = personal protective equipment; BMR = basal metabolic rate.



## 240 **Reporting bias and evidence grading**

241           Using the tool by Page et al. [16] and RoBANS 2 [17] for evaluating reporting  
242 bias, we considered the included studies were of low-to-moderate risk for reporting  
243 bias. A detailed assessment is attached (S2 File). To grade the quality of evidence,  
244 the tool Grading of Recommendations, Assessment, Development, and Evaluations  
245 (GRADE) was used. On the outcome of COVID-19 risk, the authors considered the  
246 overall grading of the evidence to be of moderate certainty, meaning the true effect is  
247 probably close to the estimated effect. This was primarily because of the large  
248 number of patients for the outcome analyzed, similar effect estimates trend between  
249 studies (all outcome analyses reported OR <1), and adjustment for multiple  
250 confounding factors. For the outcome of COVID-19 symptoms and COVID-19  
251 severity, we rated the evidence to be of low certainty, meaning the true effect might  
252 be markedly different from the estimated effect. Certainty for these outcomes was  
253 rated down for imprecision and that there were too few available studies included in  
254 the analyses.

## 255 **Discussion**

256           The protective mechanism of diet against viral respiratory disease progression  
257 has been acknowledged by several studies. A previous study found that healthy  
258 plant-based foods was associated with lower odds and severity of COVID-19 [26].  
259 Another relevant finding was that the adoption of a Traditional Mediterranean Diet  
260 contributed towards to the improvement of patients with recurring colds and frequent  
261 inflammatory complications, with significantly reduced episodes and symptoms [27].  
262 A previous systematic review found that Mediterranean diet was reported to lower



263 inflammatory biomarker levels in obese/overweight adults [28]. Similarly, a precedent  
264 meta-analysis reported Mediterranean diet adherence effectively reduce SARS-CoV-  
265 2 infection by 78% (95% CI 69%–88%), although the authors recommended cautious  
266 interpretation due to the paucity of the included studies [29].

267         These previous studies were in line with our findings. For the outcome of  
268 COVID-19, interestingly, all studies reported  $OR < 1$ , although there were differing  
269 reports on the significance of this association. Another interesting thing to note was  
270 the studies that didn't adjust for confounding factors reported significant association,  
271 while two studies that adjusted for confounding factors reported non-significant  
272 association. An exception to this was the study with the largest number of  
273 participants. The study by Yue et al. [24] adjusted for multiple confounding factors  
274 and reported higher Mediterranean diet adherence proved to be significant in  
275 lowering odds of COVID-19. These results indicated that higher Mediterranean diet  
276 adherence was a protective factor against COVID-19, although the magnitude of the  
277 effect estimate was probably minor and thus was only observable in a larger  
278 population.

279         For the outcomes of COVID-19 symptoms and severity, all studies were  
280 adjusted for confounding variables, and almost all studies recorded non-significant  
281 association. Only the study by Zagarzadeh et al. [25] reported significant association  
282 for both outcomes. These differences could be explained by a few reasons. First, the  
283 study had a cross-sectional design, and as stated by its authors, the results cannot  
284 infer a causative association. In addition, although the study scored a high NOS  
285 score, this score was obtained by using a form adapted for cross-sectional study,  
286 and may not be comparable to the NOS from cohort studies. It bears mentioning  
287 that, despite the difference in significance, the effect estimates for both COVID-19

288 symptoms and severity outcomes across all studies showed a consistent trend of OR  
289 <1. It was necessary to put into consideration that the consistent effect of  
290 Mediterranean diet adherence in all studies may be more critical than the statistically  
291 insignificant p-value [30]. In fact, a nonsignificant result does not mean that there is  
292 no effect [30], albeit it might be too presumptive to assume a protective effect of  
293 higher Mediterranean diet adherence against COVID-19 symptoms and severity  
294 without conclusive evidence. Although a meta-analysis could produce a higher  
295 statistical power for this purpose, there were a few considerations as to why it was  
296 not performed. Multiple assessment index for Mediterranean diet adherence were  
297 used between studies. In addition, most studies assigned points for Mediterranean  
298 diet adherence depending on sex-specific median consumption in the respective  
299 study. Hence, we deemed a meta-analysis was not appropriate for the diverse data.

300 Several subtypes of food were inversely associated with COVID-19 risk.  
301 Higher olive oil consumption, lower red meat consumption, lower cereal  
302 consumption, moderate amounts of alcohol, and higher intake of fruit and nuts  
303 reduced COVID-19 risk, and higher consumption of vegetables, fruits, legumes, nuts,  
304 whole grains, and fish lowered odds of severe COVID-19. The presence of  
305 flavonoids, an antiviral and immunostimulatory compounds, linked fruit consumption  
306 to a reduced risk of SARS-CoV-2 infection [31]. Vitamin C, a major vitamin in fruits  
307 and vegetables, took part in inhibiting inflammatory pathway, which was essential in  
308 the course of COVID-19 [31]. Vitamin C was also reported to be effective in  
309 preventing respiratory viral infection [32]. Olive oil and fish were excellent sources of  
310 monounsaturated fatty acids (MUFAs) and polyunsaturated fatty acids (PUFAs),  
311 which had been known to exhibit immunomodulatory properties [33]. Virgin olive oil  
312 contained phenolic compounds, such as oleocanthal, that exerted potent anti-

313 inflammatory actions, similar to ibuprofen [34]. Likewise, legumes possess bioactive  
 314 compounds which showed anti-inflammatory activity [35]. Red wine, a prevalent  
 315 alcoholic drink in Mediterranean diet, contains many types of antioxidants which  
 316 neutralize free oxygen radicals [36]. The anti-inflammatory properties of these food  
 317 groups explained their effects in diminishing risk of COVID-19 and severe COVID-  
 318 19.

## 319 **Strengths and limitations**

320 We further reviewed the strengths and limitations of each study, as listed in  
 321 Table 5. The study by Sharma et al. used objective serology data coupled with self-  
 322 reported data to define COVID-19 cases [23]. The study by Yue et al. had a large  
 323 number of participants, and all participants were health professionals which ensured  
 324 high-quality health information [24]. Most of the studies included were adjusted for  
 325 multiple confounding variables.

**Table 5. Strengths and limitations of each study.**

| Studies                             | Strengths                                                                                                                                                                                                                                  | Limitations                                                                                                                                                                                                                                                                                                                                                                                                                                                                                                                                                                                                                                     |
|-------------------------------------|--------------------------------------------------------------------------------------------------------------------------------------------------------------------------------------------------------------------------------------------|-------------------------------------------------------------------------------------------------------------------------------------------------------------------------------------------------------------------------------------------------------------------------------------------------------------------------------------------------------------------------------------------------------------------------------------------------------------------------------------------------------------------------------------------------------------------------------------------------------------------------------------------------|
| <b>El Khoury, C. N., 2021 [20]</b>  | The simultaneous use of an a priori and two a posteriori methods allowed a complementary evaluation of the dietary intake.                                                                                                                 | <ul style="list-style-type: none"> <li>• Observational study.</li> <li>• Limited participation of COVID-19 cases.</li> <li>• Self-administrated questionnaire with a possibility of a recall and estimation bias.</li> <li>• Not assessing for other aspects that affect the occurrence and the outcomes of the infection.</li> </ul>                                                                                                                                                                                                                                                                                                           |
| <b>Perez-Araluce, R., 2022 [21]</b> | -                                                                                                                                                                                                                                          | <ul style="list-style-type: none"> <li>• Focused on non-healthcare participants.</li> <li>• Unable to measure non-pharmacological preventive measures.</li> </ul>                                                                                                                                                                                                                                                                                                                                                                                                                                                                               |
| <b>Ponzo, V., et al., 2021 [22]</b> | The first that specifically evaluated the association between Mediterranean diet adherence and SARS-COV-2 infection.                                                                                                                       | <ul style="list-style-type: none"> <li>• The design of the study did not allow for establishing a direct relationship.</li> <li>• Many confounding factors related to sociocultural factors, government response to the pandemic, and differences in healthcare systems across countries may have influenced the results.</li> <li>• Questionnaires did not properly estimate the micronutrient intakes of participants.</li> <li>• The enrolment of healthcare professionals from a single region and the low percentage of male participants, as there is a gender bias in participating in the completion of food questionnaires.</li> </ul> |
| <b>Sharma, S., 2023 [23]</b>        | <ul style="list-style-type: none"> <li>• Well-established cohort, participants were followed up during the pandemic.</li> <li>• Using objective serology data coupled with self-reported data—which increases the robustness of</li> </ul> | <ul style="list-style-type: none"> <li>• Dietary intakes were estimated based on participants memory recall.</li> <li>• FFQ could have led to bias and under/over-estimation of the dietary intakes.</li> <li>• Relatively low number of infection cases.</li> </ul>                                                                                                                                                                                                                                                                                                                                                                            |

|                                   |                                                                                                                                                                                                                                                                                                                                                                      |                                                                                                                                                                                                                                                                                                                                                                                                                                                                                                            |
|-----------------------------------|----------------------------------------------------------------------------------------------------------------------------------------------------------------------------------------------------------------------------------------------------------------------------------------------------------------------------------------------------------------------|------------------------------------------------------------------------------------------------------------------------------------------------------------------------------------------------------------------------------------------------------------------------------------------------------------------------------------------------------------------------------------------------------------------------------------------------------------------------------------------------------------|
|                                   | <p>the study methodology of ascertaining the SARS-CoV-2 cases.</p> <ul style="list-style-type: none"> <li>Detailed dietary information, including macronutrients and micronutrients.</li> <li>The regression models were carefully adjusted for confounders</li> <li>Included health professionals in the sub-cohort which increase the generalizability.</li> </ul> |                                                                                                                                                                                                                                                                                                                                                                                                                                                                                                            |
| <b>Yue, Y., et al., 2022 [24]</b> | <ul style="list-style-type: none"> <li>Had access to validated and repeated measures of long-term diet.</li> <li>Information on SARS-CoV-2 infection and symptoms were captured in a timely manner.</li> <li>All study participants were health professionals which allowed authors to capture high-quality health information.</li> </ul>                           | <ul style="list-style-type: none"> <li>Only invited participants who completed the most recent survey to the COVID-19 study, which could lead to selection bias.</li> <li>No information on fatal COVID-19 cases and outcomes were based on self-report data.</li> <li>Only a small number of hospitalized COVID-19 cases.</li> <li>Possibility of residual confounding due to socioeconomic, lifestyle, and health conditions cannot be ruled out given the observational nature of the study.</li> </ul> |
| <b>Zargarzadeh, N., 2022 [25]</b> | <p>Shed light on a nutritional strategy that could be used in the fight against the COVID-19 pandemic.</p>                                                                                                                                                                                                                                                           | <ul style="list-style-type: none"> <li>Cross-sectional design, this study cannot infer causation, and thus recommendations cannot be affirmed.</li> <li>Possibility of residual confounding cannot be completely ruled out.</li> <li>All participants were drawn from a single-center, so generalizability to the general public should be approached with caution.</li> <li>FFQs rely on interviewees' memory, the memory bias inherent in this type of questionnaire cannot be ignored.</li> </ul>       |

326           The major limitation was that Mediterranean diet adherence of all studies was  
327 self-reported. Measurement errors in FFQs are known to affect results of studies and  
328 may have biased the observed effect estimates. FFQs were prone to biased  
329 responses, such as recall and estimation bias. However, FFQs were often used in  
330 large cohort studies because it is realistic and is logistically feasible. Two of the  
331 studies stated they had inadequate cases for observed outcome to produce a  
332 significant result [23-24].

333           To our knowledge, this systematic review is the first to specifically investigate  
334 the relationship between Mediterranean diet and COVID-19 risk, symptoms, and  
335 severity. Additionally, each of the study selection and bias assessment process was  
336 conducted by multiple reviewers to ensure minimal bias. This was done in  
337 accordance with the Cochrane guidelines [37].

338           This systematic review has some limitations that should be considered when  
339 interpreting the results. First, there were few studies included in this systematic  
340 review. Second, as a meta-analysis is not performed, the magnitude of the effects  
341 could not be precisely measured.

## 342 **Public health implications**

343           This systematic review provides an up-to-date summary of the available  
344 evidence. As more and more countries have loosened on personal protective  
345 equipment (PPE) and social distancing regulations, a nutritional strategy may be  
346 more feasible and beneficial long-term. The results of the present study may shed  
347 some light on additional benefits of Mediterranean diet against COVID-19. The  
348 findings also suggest that specific food groups in the Mediterranean diet may be  
349 more important in reducing COVID-19 odds. More studies should be conducted  
350 before definitive conclusions can be drawn.

## 351 **Conclusion**

352           Overall, the analyses suggest higher Mediterranean diet adherence  
353 significantly reduced odds of COVID-19, with non-significant results against COVID-  
354 19 symptoms and severity.

## 355 **Acknowledgements**

356           We sincerely thank all researchers who have contributed their studies, without  
357 whom this systematic review would not be possible.

## 358 **Author contributions**

359 **Conceptualization:** Ceria Halim.

360 **Data curation:** Ceria Halim, Miranda Howen, Athirah Amirah Nabilah binti

361 Fitrisubroto, Timotius Pratama, Indah Ramadhani Harahap, Lacman Jaya Ganesh.

362 **Formal analysis:** Ceria Halim, Miranda Howen, Athirah Amirah Nabilah binti

363 Fitrisubroto, Timotius Pratama, Indah Ramadhani Harahap, Lacman Jaya Ganesh.

364 **Funding acquisition:** Andre Marolop Pangihutan Siahaan.

365 **Investigation:** Ceria Halim, Miranda Howen, Athirah Amirah Nabilah binti

366 Fitrisubroto.

367 **Methodology:** Ceria Halim.

368 **Project administration:** Andre Marolop Pangihutan Siahaan.

369 **Resources:** Ceria Halim.

370 **Supervision:** Andre Marolop Pangihutan Siahaan.

371 **Validation:** Timotius Pratama, Indah Ramadhani Harahap, Lacman Jaya Ganesh.

372 **Visualization:** Ceria Halim.

373 **Writing – original draft:** Ceria Halim, Timotius Pratama, Lacman Jaya Ganesh.

374 **Writing – review & editing:** Ceria Halim, Andre Marolop Pangihutan Siahaan.

## 375 **Funding**

376 The author(s) received no specific funding for this work.

## 377 **Competing interests**

378 The authors declare no conflict of interest.

## 379 **References**

- 380 1. World Health Organization. Rolling updates on coronavirus disease (COVID-  
381 19) [Internet]. [Updated 2020 Jul 31; cited 2023 Oct 16]. Available from:  
382 [https://www.who.int/emergencies/diseases/novel-coronavirus-2019/events-as-](https://www.who.int/emergencies/diseases/novel-coronavirus-2019/events-as-they-happen)  
383 [they-happen](https://www.who.int/emergencies/diseases/novel-coronavirus-2019/events-as-they-happen)
- 384 2. Clinical management of COVID-19: Living guideline [Internet]. Geneva: World  
385 Health Organization; 2022 Jun 23-. Available from:  
386 <https://www.ncbi.nlm.nih.gov/books/NBK582435/>
- 387 3. Manjili RH, Zarei M, Habibi M, Manjili MH. COVID-19 as an Acute  
388 Inflammatory Disease. *J Immunol*. 2020 Jul 1;205(1):12-19. doi:  
389 10.4049/jimmunol.2000413. Epub 2020 May 18. PMID: 32423917; PMCID:  
390 PMC7333792.
- 391 4. Mathur P, Kottlilil S. Immunomodulatory therapies for COVID-19. *Front Med*  
392 (Lausanne). 2022 Aug 3;9:921452. doi: 10.3389/fmed.2022.921452. PMID:  
393 35991665; PMCID: PMC9381694.
- 394 5. Estruch R, Ros E, Salas-Salvadó J, Covas MI, Corella D, Arós F, et al.  
395 Primary Prevention of Cardiovascular Disease with a Mediterranean Diet  
396 Supplemented with Extra-Virgin Olive Oil or Nuts. *N Engl J Med*. 2018 Jun  
397 21;378(25):e34. doi: 10.1056/NEJMoa1800389. Epub 2018 Jun 13. PMID:  
398 29897866.
- 399 6. Casas R, Sacanella E, Estruch R. The immune protective effect of the  
400 Mediterranean diet against chronic low-grade inflammatory diseases. *Endocr*  
401 *Metab Immune Disord Drug Targets*. 2014;14(4):245-54. doi:  
402 10.2174/1871530314666140922153350. PMID: 25244229; PMCID:  
403 PMC4443792.

- 404 7. Suardi C, Cazzaniga E, Graci S, Dongo D, Palestini P. Link between Viral  
405 Infections, Immune System, Inflammation and Diet. *Int J Environ Res Public*  
406 *Health*. 2021 Mar 2;18(5):2455. doi: 10.3390/ijerph18052455. PMID:  
407 33801527; PMCID: PMC7967579.
- 408 8. Ferro Y, Pujia R, Maurotti S, Boragina G, Mirarchi A, Gnagnarella P, et al.  
409 Mediterranean Diet a Potential Strategy against SARS-CoV-2 Infection: A  
410 Narrative Review. *Medicina (Kaunas)*. 2021 Dec 20;57(12):1389. doi:  
411 10.3390/medicina57121389. PMID: 34946334; PMCID: PMC8704657.
- 412 9. Angelidi AM, Kokkinos A, Katechaki E, Ros E, Mantzoros CS. Mediterranean  
413 diet as a nutritional approach for COVID-19. *Metabolism*. 2021  
414 Jan;114:154407. doi: 10.1016/j.metabol.2020.154407. Epub 2020 Oct 17.  
415 PMID: 33080270; PMCID: PMC7833284.
- 416 10. Page MJ, McKenzie JE, Bossuyt PM, Boutron I, Hoffmann TC, Mulrow CD, et  
417 al. The PRISMA 2020 statement: an updated guideline for reporting  
418 systematic reviews. *BMJ*. 2021 Mar 29;372:n71. doi: 10.1136/bmj.n71. PMID:  
419 33782057; PMCID: PMC8005924.
- 420 11. Ouzzani M, Hammady H, Fedorowicz Z, Elmagarmid A. Rayyan-a web and  
421 mobile app for systematic reviews. *Syst Rev*. 2016 Dec 5;5(1):210. doi:  
422 10.1186/s13643-016-0384-4. PMID: 27919275; PMCID: PMC5139140.
- 423 12. Wells GA, Shea B, O'Connell D, Peterson J, Welch V, Losos M, Tugwell P.  
424 The Newcastle-Ottawa Scale (NOS) for assessing the quality of  
425 nonrandomised studies in meta-analyses [Internet]. [Updated 2021; cited  
426 2023 Oct 8]. Available from:  
427 [https://www.ohri.ca/programs/clinical\\_epidemiology/oxford.asp](https://www.ohri.ca/programs/clinical_epidemiology/oxford.asp)



- 428 13. Modesti PA, Reboldi G, Cappuccio FP, Agyemang C, Remuzzi G, Rapi S, et  
429 al. Panethnic Differences in Blood Pressure in Europe: A Systematic Review  
430 and Meta-Analysis. PLoS One. 2016 Jan 25;11(1):e0147601. doi:  
431 10.1371/journal.pone.0147601. PMID: 26808317; PMCID: PMC4725677.
- 432 14. Sterne JAC, Savović J, Page MJ, Elbers RG, Blencowe NS, Boutron I, et al.  
433 RoB 2: a revised tool for assessing risk of bias in randomised trials. BMJ.  
434 2019 Aug 28;366:l4898. doi: 10.1136/bmj.l4898. PMID: 31462531.
- 435 15. Barnett-Page E, Thomas J. Methods for the synthesis of qualitative research:  
436 a critical review. BMC Med Res Methodol. 2009 Aug 11;9:59. doi:  
437 10.1186/1471-2288-9-59. PMID: 19671152; PMCID: PMC3224695.
- 438 16. Page MJ, McKenzie JE, Higgins JPT. Tools for assessing risk of reporting  
439 biases in studies and syntheses of studies: a systematic review. BMJ Open.  
440 2018 Mar 14;8(3):e019703. doi: 10.1136/bmjopen-2017-019703. PMID:  
441 29540417; PMCID: PMC5857645.
- 442 17. Seo HJ, Kim SY, Lee YJ, Park JE. RoBANS 2: A Revised Risk of Bias  
443 Assessment Tool for Nonrandomized Studies of Interventions. Korean J Fam  
444 Med. 2023 Sep;44(5):249-260. doi: 10.4082/kjfm.23.0034. Epub 2023 Jul 7.  
445 PMID: 37423253; PMCID: PMC10522469.
- 446 18. BMJ Best Practice. What is GRADE? [Internet]. [Cited 2023 Oct 19].  
447 Available from: [https://bestpractice.bmj.com/info/toolkit/learn-ebm/what-is-](https://bestpractice.bmj.com/info/toolkit/learn-ebm/what-is-grade/)  
448 [grade/](https://bestpractice.bmj.com/info/toolkit/learn-ebm/what-is-grade/)
- 449 19. Mohajeri M, Mohajery R, Cicero AFG. Adherence to the Mediterranean Diet  
450 Association with Serum Inflammatory Factors Stress Oxidative and Appetite in  
451 COVID-19 Patients. Medicina (Kaunas). 2023 Jan 26;59(2):227. doi:  
452 10.3390/medicina59020227. PMID: 36837428; PMCID: PMC9968085.

- 453 20. El Khoury CN, Julien SG. Inverse Association Between the Mediterranean  
454 Diet and COVID-19 Risk in Lebanon: A Case-Control Study. *Front Nutr.* 2021  
455 Jul 30;8:707359. doi: 10.3389/fnut.2021.707359. PMID: 34395500; PMCID:  
456 PMC8363114.
- 457 21. Perez-Araluce R, Martínez-González MÁ, Gea A, Carlos S. Components of  
458 the Mediterranean Diet and Risk of COVID-19. *Front Nutr.* 2022 Jan  
459 24;8:805533. doi: 10.3389/fnut.2021.805533. PMID: 35141266; PMCID:  
460 PMC8819171.
- 461 22. Ponzio V, Pellegrini M, D'Eusebio C, Bioletto F, Goitre I, Buscemi S, Frea S,  
462 Ghigo E, Bo S. Mediterranean Diet and SARS-COV-2 Infection: Is There Any  
463 Association? A Proof-of-Concept Study. *Nutrients.* 2021 May 19;13(5):1721.  
464 doi: 10.3390/nu13051721. PMID: 34069656; PMCID: PMC8160854.
- 465 23. Sharma S, Di Castelnuovo A, Costanzo S, Persichillo M, Panzera T, Ruggiero  
466 E, et al. Habitual adherence to a traditional Mediterranean diet and risk of  
467 SARS-CoV-2 infection and Coronavirus disease 2019 (COVID-19): a  
468 longitudinal analysis. *Int J Food Sci Nutr.* 2023 May;74(3):382-394. doi:  
469 10.1080/09637486.2023.2212879. Epub 2023 Jun 1. PMID: 37260396.
- 470 24. Yue Y, Ma W, Accorsi EK, Ding M, Hu F, Willett WC, et al. Long-term diet and  
471 risk of Severe Acute Respiratory Syndrome Coronavirus 2 (SARS-CoV-2)  
472 infection and Coronavirus Disease 2019 (COVID-19) severity. *Am J Clin Nutr.*  
473 2022 Dec 19;116(6):1672-1681. doi: 10.1093/ajcn/nqac219. PMID: 35945354;  
474 PMCID: PMC9384672.
- 475 25. Zargarzadeh N, Tadbir Vajargah K, Ebrahimzadeh A, Mousavi SM, Khodaveisi  
476 H, Akhgarjand C, Toyos FMP, Cerqueira HS, Santos HO, Taghizadeh M,  
477 Milajerdi A. Higher Adherence to the Mediterranean Dietary Pattern Is

- 478 Inversely Associated With Severity of COVID-19 and Related Symptoms: A  
479 Cross-Sectional Study. *Front Med (Lausanne)*. 2022 Jul 19;9:911273. doi:  
480 10.3389/fmed.2022.911273. PMID: 35928288; PMCID: PMC9343686.
- 481 26. Kim H, Rebholz CM, Hegde S, LaFiura C, Raghavan M, Lloyd JF, Cheng S,  
482 Seidelmann SB. Plant-based diets, pescatarian diets and COVID-19 severity:  
483 a population-based case-control study in six countries. *BMJ Nutr Prev Health*.  
484 2021 Jun 7;4(1):257-266. doi: 10.1136/bmjnp-2021-000272. PMID:  
485 34308134; PMCID: PMC8219480.
- 486 27. Calatayud FM, Calatayud B, Gallego JG, González-Martín C, Alguacil LF.  
487 Effects of Mediterranean diet in patients with recurring colds and frequent  
488 complications. *Allergol Immunopathol (Madr)*. 2017 Sep-Oct;45(5):417-424.  
489 doi: 10.1016/j.aller.2016.08.006. Epub 2016 Dec 7. PMID: 27939720.
- 490 28. Moore E, Fadel A, Lane KE. The effects of consuming a Mediterranean style  
491 diet on associated COVID-19 severity biomarkers in obese/overweight adults:  
492 A systematic review. *Nutr Health*. 2022 Dec;28(4):647-667. doi:  
493 10.1177/02601060221127853. Epub 2022 Sep 21. PMID: 36131504; PMCID:  
494 PMC9494166.
- 495 29. Rahmati M, Fatemi R, Yon DK, Lee SW, Koyanagi A, Il Shin J, Smith L. The  
496 effect of adherence to high-quality dietary pattern on COVID-19 outcomes: A  
497 systematic review and meta-analysis. *J Med Virol*. 2023 Jan;95(1):e28298.  
498 doi: 10.1002/jmv.28298. Epub 2022 Nov 18. PMID: 36367218; PMCID:  
499 PMC9877891.
- 500 30. Borenstein M, Hedges LV, Higgins JPT, Rothstein HR. *Introduction to Meta-*  
501 *Analysis* 1st ed. West Sussex, United Kingdom: John Wiley & Sons Ltd; 2009.

- 502 31. Skrajnowska D, Brumer M, Kankowska S, Matysek M, Miazio N, Bobrowska-  
503 Korczak B. Covid 19: Diet Composition and Health. *Nutrients*. 2021 Aug  
504 27;13(9):2980. doi: 10.3390/nu13092980. PMID: 34578858; PMCID:  
505 PMC8472186.
- 506 32. de Faria Coelho-Ravagnani C, Corgosinho FC, Sanches FFZ, Prado CMM,  
507 Laviano A, Mota JF. Dietary recommendations during the COVID-19  
508 pandemic. *Nutr Rev*. 2021 Mar 9;79(4):382-393. doi: 10.1093/nutrit/nuaa067.  
509 PMID: 32653930; PMCID: PMC7454801.
- 510 33. Coniglio S, Shumskaya M, Vassiliou E. Unsaturated Fatty Acids and Their  
511 Immunomodulatory Properties. *Biology (Basel)*. 2023 Feb 9;12(2):279. doi:  
512 10.3390/biology12020279. PMID: 36829556; PMCID: PMC9953405.
- 513 34. Lucas L, Russell A, Keast R. Molecular mechanisms of inflammation. Anti-  
514 inflammatory benefits of virgin olive oil and the phenolic compound  
515 oleocanthal. *Curr Pharm Des*. 2011;17(8):754-68. doi:  
516 10.2174/138161211795428911. PMID: 21443487.
- 517 35. Juárez-Chairez MF, Meza-Márquez OG, Márquez-Flores YK, Jiménez-  
518 Martínez C. Potential anti-inflammatory effects of legumes: a review. *Br J Nutr*.  
519 2022 Dec 14;128(11):2158-2169. doi: 10.1017/S0007114522000137. Epub  
520 2022 Jan 19. PMID: 35042569.
- 521 36. Santos-Buelga C, González-Manzano S, González-Paramás AM. Wine,  
522 Polyphenols, and Mediterranean Diets. What Else Is There to Say?  
523 *Molecules*. 2021 Sep 12;26(18):5537. doi: 10.3390/molecules26185537.  
524 PMID: 34577008; PMCID: PMC8468969.
- 525 37. Higgins JPT, Thomas J, Chandler J, Cumpston M, Li T, Page MJ, Welch VA  
526 (editors). *Cochrane Handbook for Systematic Reviews of Interventions*

527 version 6.4 [updated August 2023]. Cochrane, 2023. Available from  
528 [www.training.cochrane.org/handbook](http://www.training.cochrane.org/handbook).

## 529 **Supporting Information**

530 **S1 File. Detailed search strategies and MeSH.**

531 **S2 File. Reporting bias risk assessment.**

532 **S3 File. PRISMA 2020 abstract checklist.**

533 **S4 File. PRISMA 2020 main checklist.**

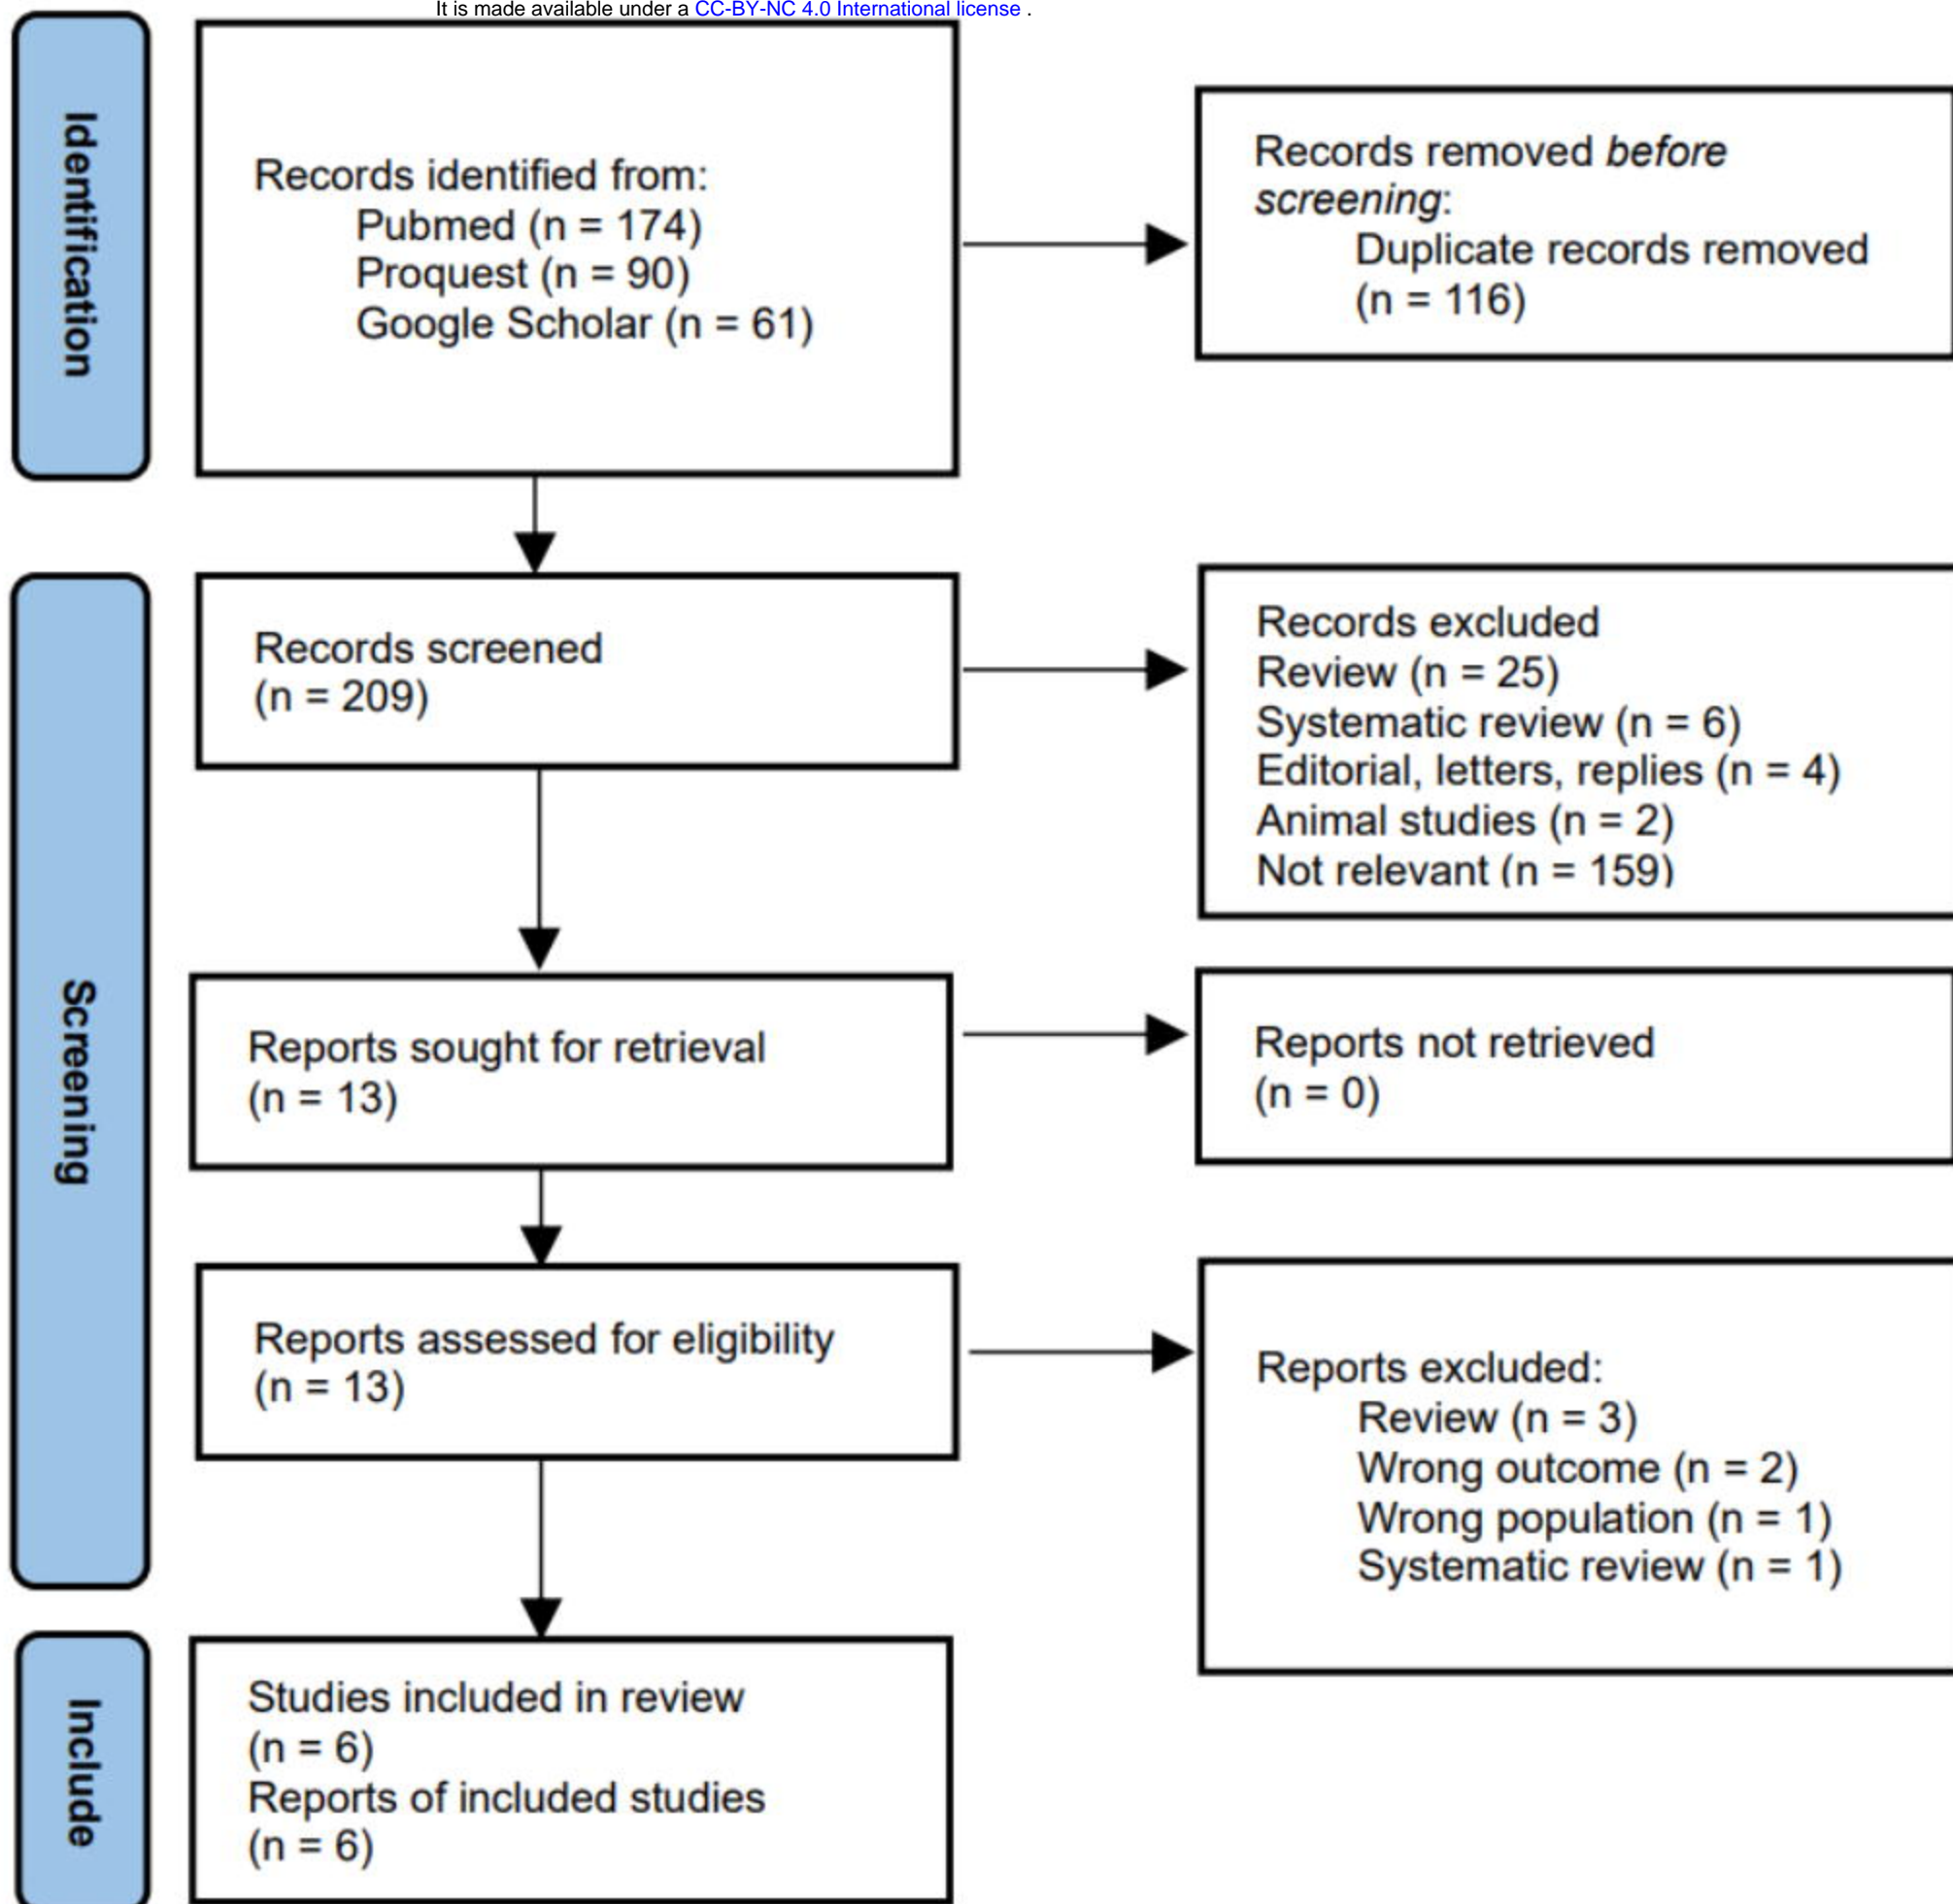

Source: https://medrxiv.org/content/10.1101/2024.03.24.24304597v1.full.pdf
